# Supplementary material
Source: publisher figshare collection journal article supplement (https://karger.figshare.com/ndownloader/files/22162584)
Supplement: Supplementary file 1 [file 22162584]

**Supplementary material**

## **Table A1.** Summary of central pathological review

|  | No. of patients | Median Ki67 index (%) | Findings |
| --- | --- | --- | --- |
| Well differentiated NENs |  |  |  |
| NET G1 | 33 |  |  |
| NET G2 | 1 | 16 | No teratoma component. |
| (NET G3) | 0 |  |  |
| Poorly differentiated NENs |  |  |  |
| NEC | 10 | 70 |  |
| MANEC (MiNEN) | 4 |  | MiNEN were all MANEC. |

Abbreviations: NEN, neuroendocrine neoplasm; NET, neuroendocrine tumor; NEC, neuroendocrine carcinoma; MANEC, mixed adeno-neuroendocrine carcinoma; MiNEN, Mixed endocrine non-endocrine neoplasms. WHO 2019 guideline criteria for GEP-NEN is given in parenthesis.

**Table A2.** Number of Patients by Stage and Age

|  | Age | | | | | | | |  |
| --- | --- | --- | --- | --- | --- | --- | --- | --- | --- |
| FIGO stage | 20s | 30s | 40s | 50s | 60s | 70s | 80s | Total | |
| Ia | 2 | 3 | 4 | 6 | 11 | 5 | 2 | 33 | |
| Ib | 0 | 1 | 0 | 0 | 0 | 0 | 0 | 1 | |
| Ic | 0 | 0 | 0 | 0 | 0 | 0 | 0 | 0 | |
| IIa | 0 | 0 | 1 | 0 | 0 | 0 | 0 | 1 | |
| IIb | 0 | 0 | 0 | 0 | 0 | 1 | 0 | 1 | |
| IIc | 1 | 0 | 0 | 0 | 0 | 0 | 0 | 1 | |
| IIIa | 0 | 0 | 0 | 0 | 0 | 0 | 0 | 0 | |
| IIIb | 0 | 0 | 0 | 0 | 1 | 0 | 0 | 1 | |
| IIIc | 0 | 1 | 0 | 1 | 2 | 0 | 0 | 4 | |
| IV | 0 | 0 | 2 | 2 | 0 | 1 | 0 | 5 | |
| NAC | 0 | 0 | 0 | 0 | 1 | 0 | 0 | 1 | |
| Total | 3 | 5 | 7 | 9 | 15 | 7 | 2 | 48 | |

Abbreviations: FIGO, International Federation of Gynecology and Obstetrics; NAC, neoadjuvant chemotherapy.

**Table A3.** Number of Patients by Stage and Histological Type

|  | Histological type | | | |  |
| --- | --- | --- | --- | --- | --- |
| FIGO stage | NET G1 | NET G2 | NEC | MANEC | Total |
| Ia | 31 | 0 | 0 | 2 | 33 |
| Ib | 0 | 0 | 1 | 0 | 1 |
| Ic | 0 | 0 | 0 | 0 | 0 |
| IIa | 1 | 0 | 0 | 0 | 1 |
| IIb | 0 | 1 | 0 | 0 | 1 |
| IIc | 1 | 0 | 0 | 0 | 1 |
| IIIa | 0 | 0 | 0 | 0 | 0 |
| IIIb | 0 | 0 | 1 | 0 | 1 |
| IIIc | 0 | 0 | 3 | 1 | 4 |
| IV | 0 | 0 | 5 | 0 | 5 |
| NAC | 0 | 0 | 0 | 1 | 1 |
| Total | 33 | 1 | 10 | 4 | 48 |

Abbreviations: FIGO, International Federation of Gynecology and Obstetrics; NAC, neoadjuvant chemotherapy; NET, neuroendocrine tumor; NEC, neuroendocrine carcinoma; MANEC, mixed adeno-neuroendocrine carcinoma.

**Table A4.** Number of Patients by Age and Histological Type

|  | Age | | | | | | |  |
| --- | --- | --- | --- | --- | --- | --- | --- | --- |
| Histological type | 20s | 30s | 40s | 50s | 60s | 70s | 80s | Total |
| NET G1 | 3 | 3 | 5 | 6 | 10 | 5 | 1 | 33 |
| NET G2 | 0 | 0 | 0 | 0 | 0 | 1 | 0 | 1 |
| NEC | 0 | 2 | 2 | 2 | 3 | 1 | 0 | 10 |
| MANEC | 0 | 0 | 0 | 1 | 2 | 0 | 1 | 4 |
| Total | 3 | 5 | 7 | 9 | 15 | 7 | 2 |  |

Abbreviations: NET, neuroendocrine tumor; NEC, neuroendocrine carcinoma; MANEC, mixed adeno-neuroendocrine carcinoma.
